# Supplementary material
Source: Elsevier journal article supplement (https://www.sciencedirect.com/science/article/pii/S2013251418300361)
Supplement: mmc2 [file S2013251418300361:mmc2.pdf]

Table 2S. Biochemical parameters in SLE patients accord sex.

| Variable                                       | Total<br>n = 22  | Male<br>n=3 (13.6% ) | Female<br>n= 19 (86.3%) | p Value |
|------------------------------------------------|------------------|----------------------|-------------------------|---------|
| Serum urea [mg/dl, means $\pm$ SD]             | 48.1 $\pm$ 49.67 | 106.99 $\pm$ 99.26   | 39.01 $\pm$ 33.6        | 0.466   |
| Serum creatinine [mg/dl, means $\pm$ SD]       | 1.20 $\pm$ 1.17  | 2.43 $\pm$ 2.74      | 1.01 $\pm$ .68          | 0.366   |
| Serum albumin [g/dl, means $\pm$ SD]           | 2.74 $\pm$ 1.41  | 2.38 $\pm$ 2.01      | 2.84 $\pm$ 3.36         | 0.735   |
| 24-hour urine protein [g/24 h, means $\pm$ SD] | 3.6 $\pm$ 4.4    | 4.1 $\pm$ 3.5        | 3.5 $\pm$ 4.6           | 0.83    |
| Complement C3 [mg/dl, means $\pm$ SD]          | 65.89 $\pm$ 28.1 | 62.5 $\pm$ 38.5      | 66.4 $\pm$ 27.5         | 0.963   |
| Complement C4 [mg/dl, means $\pm$ SD]          | 13.9 $\pm$ 28.1  | 13.5 $\pm$ 10.2      | 13.3 $\pm$ 5.28         | 0.813   |
| SLEDAI                                         | 11 $\pm$ 9.6     | 14 $\pm$ 12.1        | 10.9 $\pm$ 9.47         | 0.712   |
| uTWEAK [pg/mg Cr, means $\pm$ SD]              | 8.13 $\pm$ 7.64  | 2.34 $\pm$ 1.76      | 9.05 $\pm$ 7.83         | 0.005   |
